# Supplementary material for: WEE1 inhibition enhances the antitumor immune response to PD-L1 blockade by the concomitant activation of STING and STAT1 pathways in SCLC
Source: PubMed Central journal article supplement (PMC9449677; doi:10.1016/j.celrep.2022.110814), 2022-05-17
Supplement: NIHMS1808947-supplement-1.pdf [file NIHMS1808947-supplement-1.pdf]

**Supplemental information**

**WEE1 inhibition enhances the antitumor immune  
response to PD-L1 blockade by the concomitant  
activation of STING and STAT1 pathways in SCLC**

**Hirokazu Taniguchi, Rebecca Caeser, Shweta S. Chavan, Yingqian A. Zhan, Andrew Chow, Parvathy Manoj, Fathema Uddin, Hidenori Kitai, Rui Qu, Omar Hayatt, Nisargbhai S. Shah, Álvaro Quintanal Villalonga, Viola Allaj, Evelyn M. Nguyen, Joseph Chan, Adam O. Michel, Hiroshi Mukae, Elisa de Stanchina, Charles M. Rudin, and Triparna Sen**

Figure S1:

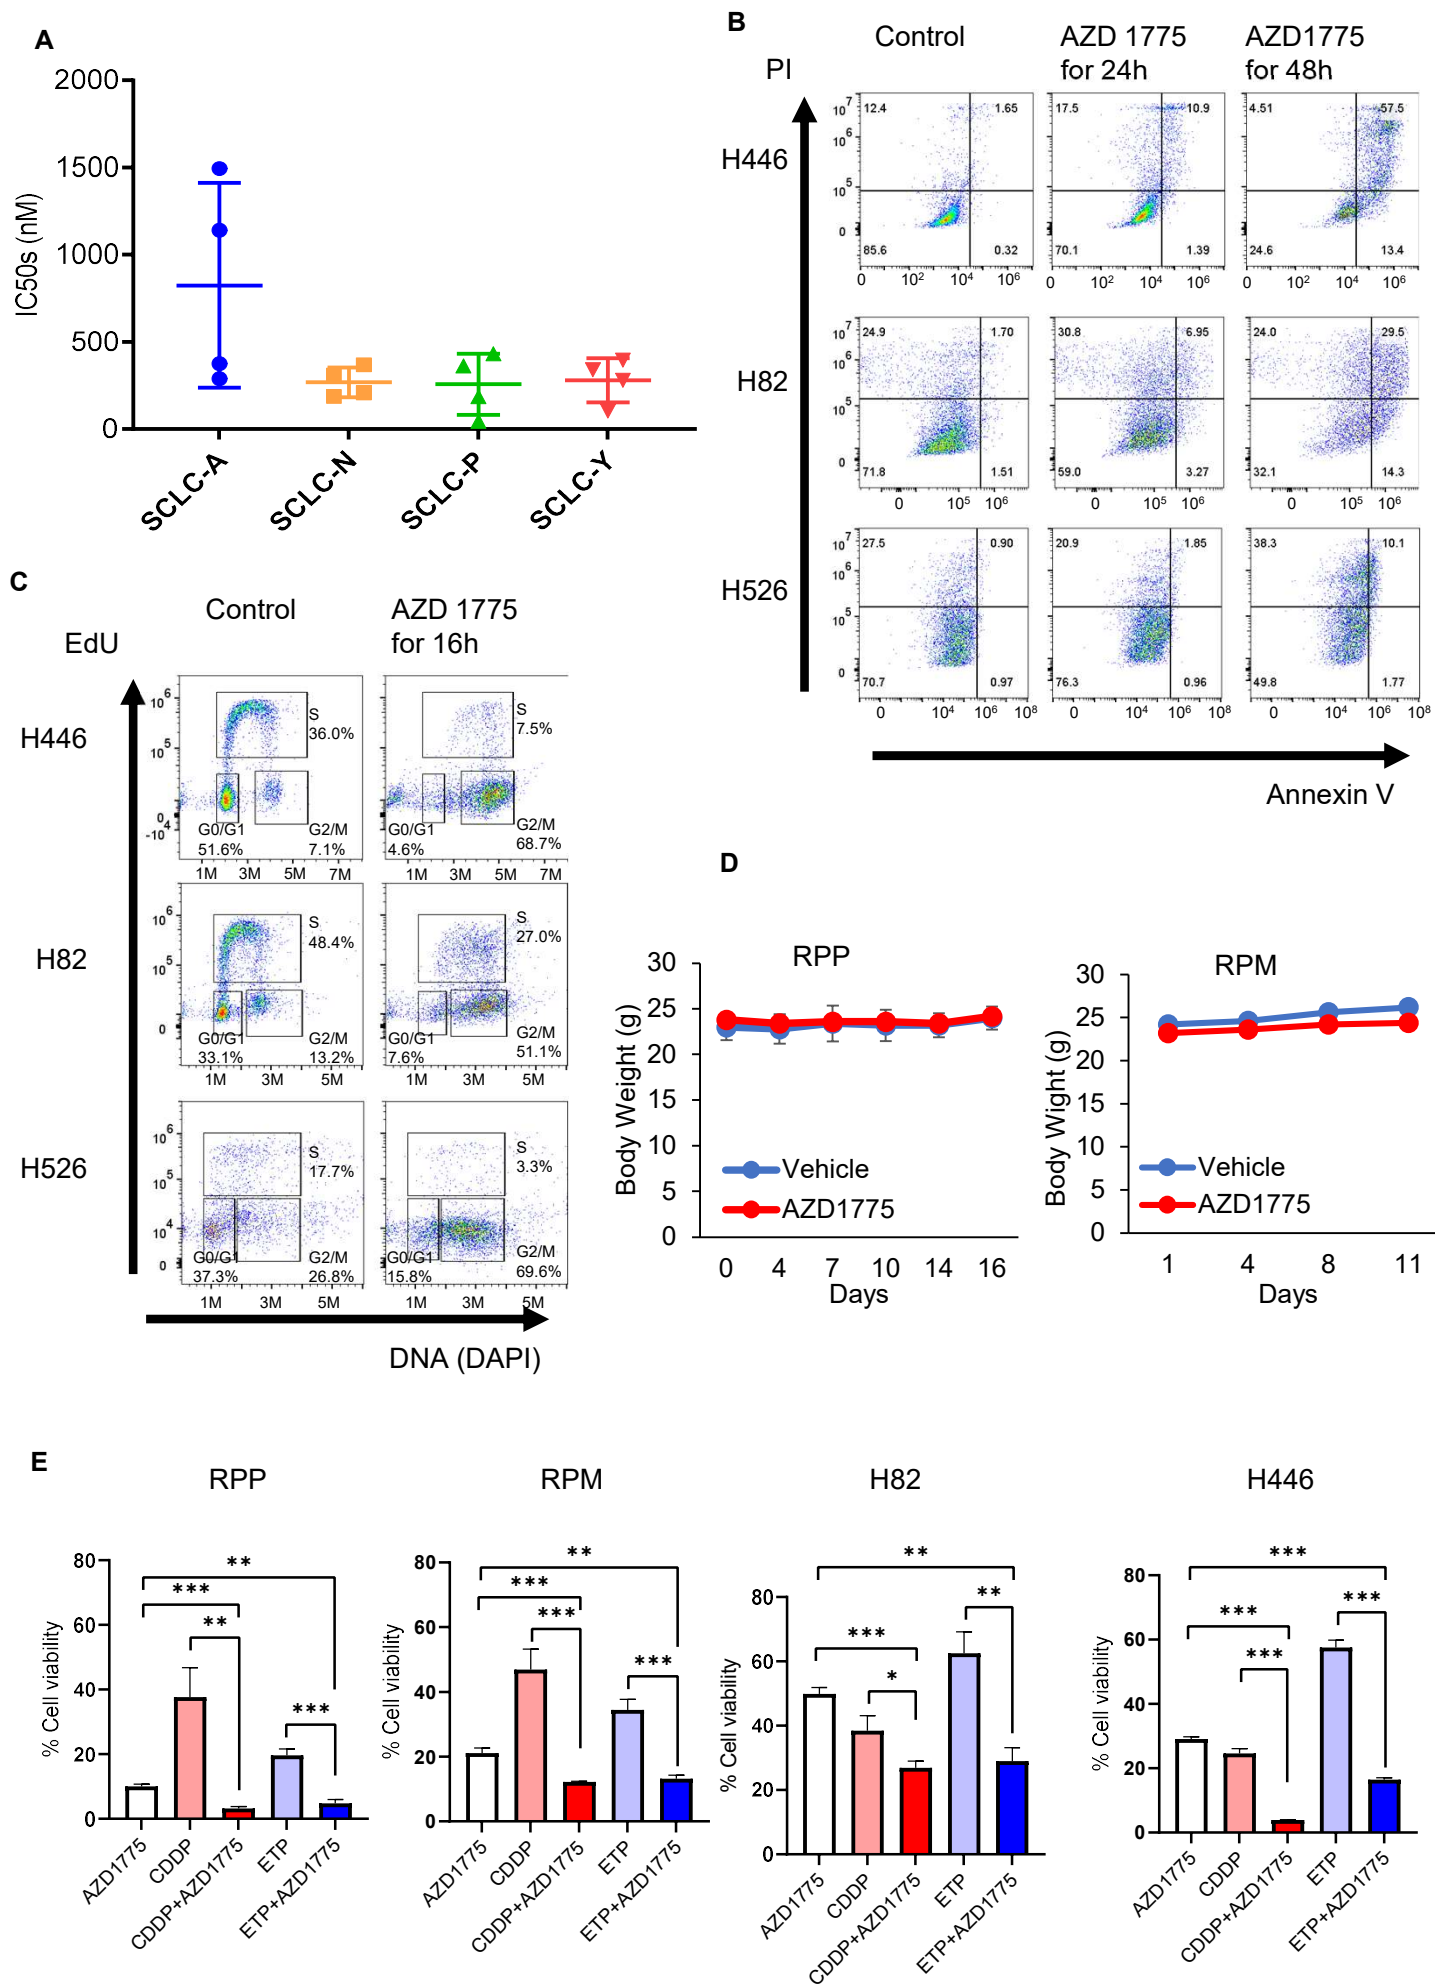

**Figure S1. The effect of AZD1775 in SCLC cells, Related to Figure 1.**

(A)  $IC_{50}$  values from Fig.1A grouped by SCLC subtype. Each dot represents the mean  $IC_{50}$  value of one cell line. (B) Representative flow cytometry plots of annexin V-PI assay staining in H446, H82, H526 cells treated with 1  $\mu$ M AZD1775 for 24 or 48 hours. (C) Representative plots of EdU-DAPI based flow cytometry in H82, H446, H526 cells treated with 1  $\mu$ M AZD1775 for 16 hours. (D) Body weight changes of nude mice treated with vehicle or 60 mg/kg of AZD1775 ( $n = 5$ ). Bars represent mean  $\pm$  SD. Statistical significance was determined using Student's t-test. (E) The RPP and RPM cells were incubated with 0.5  $\mu$ M AZD1775, 3  $\mu$ M cisplatin (CDDP) and/or 0.3  $\mu$ M etoposide (ETP) for 72 h, the H82 and H446 cells were incubated with 0.3  $\mu$ M AZD1775, 3  $\mu$ M cisplatin (CDDP) and/or 0.3  $\mu$ M etoposide (ETP) for 72 h, The cell viability was determined using CellTiter-Glo luminescent cell viability assay. Percentages were normalized to DMSO control and bars represent mean  $\pm$  SD of triplicate. Statistical significance was determined using Student's t-test (\* $p < 0.05$ , \*\* $p < 0.01$ , \*\*\* $p < 0.001$ ).

Figure S2:

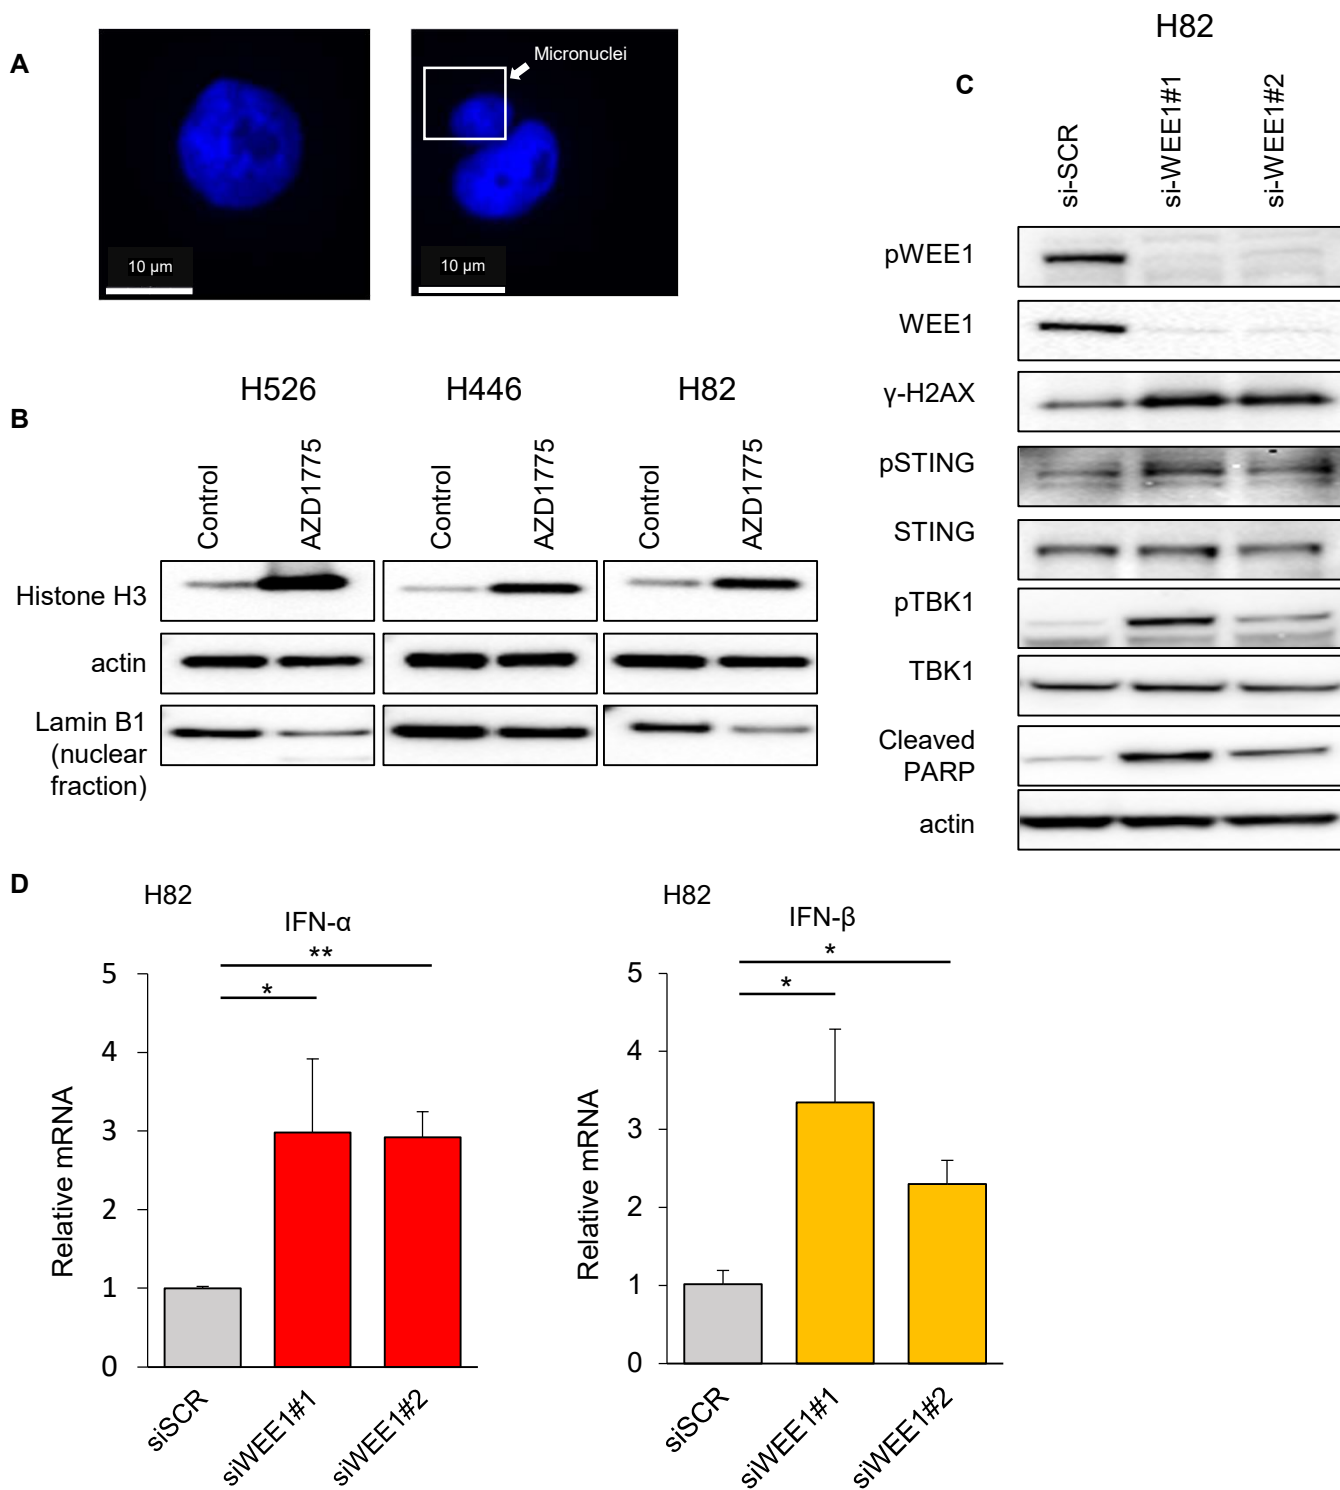

**Figure S2. DNA damage induced by AZD1775 and the activation of the STING pathway by genetic knockdown of WEE1 with siRNA, Related to Figure 2.**

(A) Representative images of DAPI-stained H82 cells showing micronuclei after 1  $\mu$ M AZD1775 treatment for 24 hours (Right), as compared to untreated control (Left). White box and arrow indicate a typical micronuclei formation. (B) Immunoblot of histone H3 in the cytosolic fraction of SCLC cells treated with 1  $\mu$ M AZD1775 for 48 hours. Nuclear Lamin B1 shows the degree of fractionation achieved. (C-D) WEE1 was knocked down using WEE1-specific siRNAs (#1 and #2) or nonspecific siRNA control (si-SCR). (C) Western blot showing expression of phospho (p)- and total (t)-WEE1,  $\gamma$ H2AX, p- and t-STING, p- and t-TBK1, cleaved PARP, and actin (loading control) in H82 cells following knockdown. (D) Quantitative mRNA expression of IFN- $\alpha$ , IFN- $\beta$ . The bars represent mean  $\pm$  SD of triplicate. Statistical significance was determined using Student's t-test (\*p < 0.05, \*\*p < 0.01, \*\*\*p < 0.001).

Figure S3:

**A**

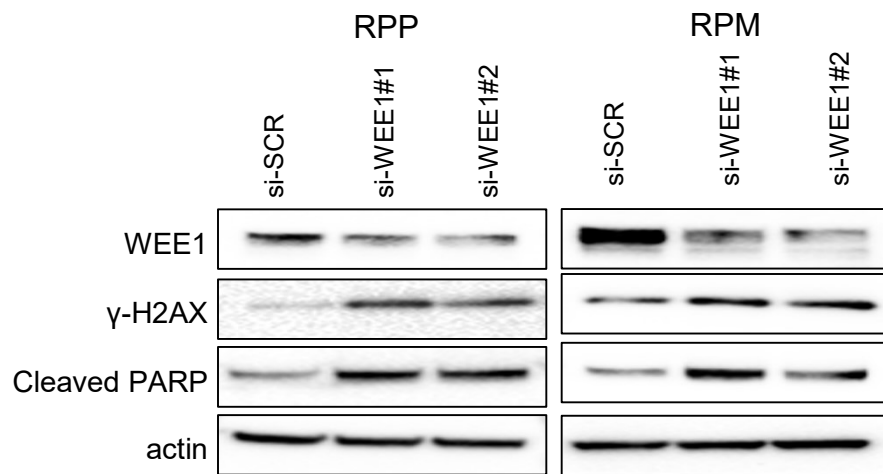

**B**

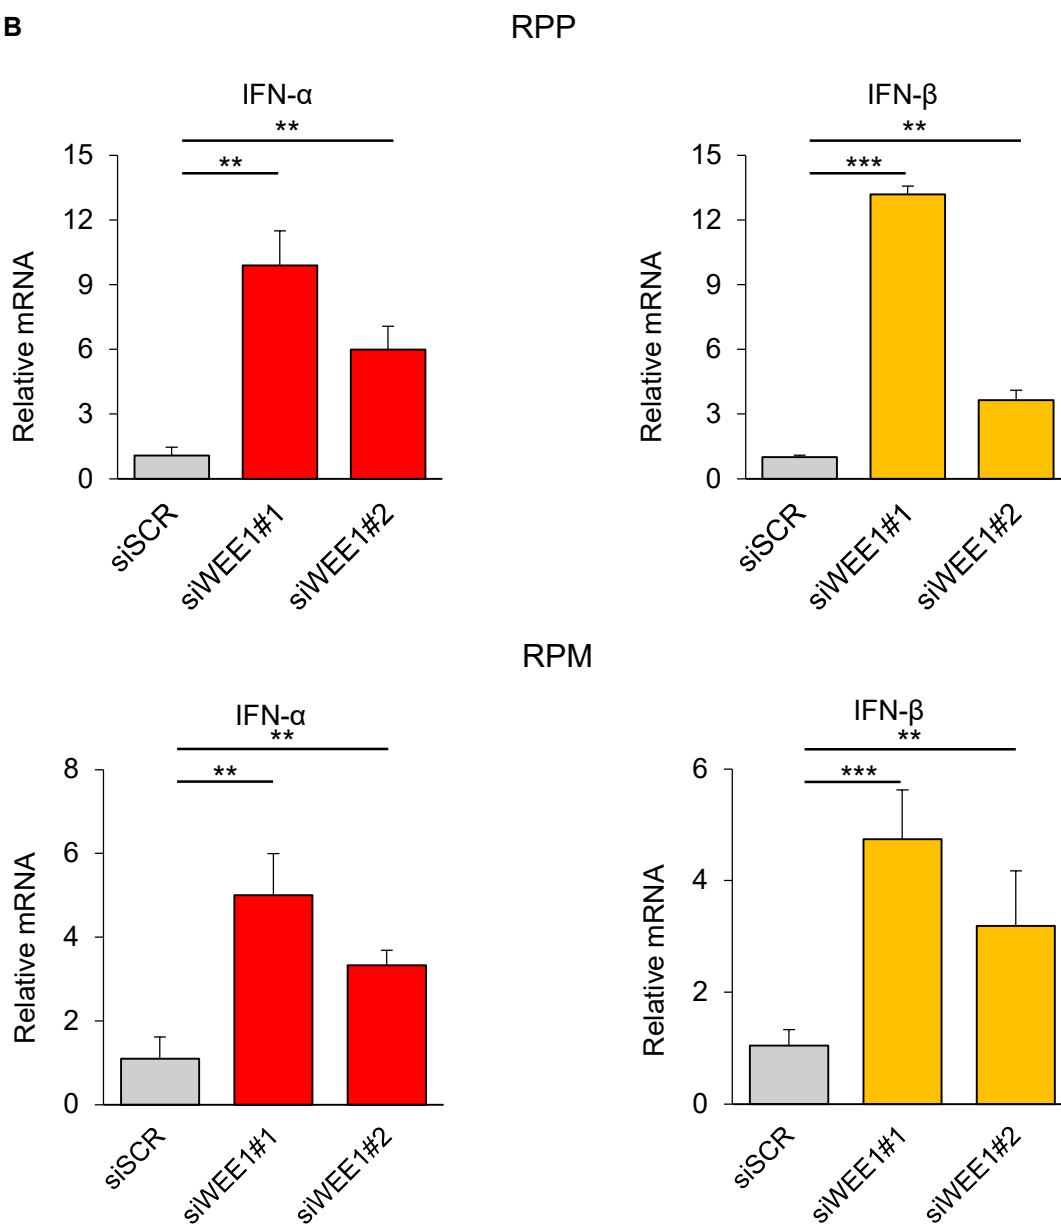

**Figure S3. siRNA Knockdown of WEE1 induces mRNA expression of type I IFNs in RPP and RPM cells, Related to Figure 2.**

Knockdown of WEE1 with WEE1-specific siRNAs (#1 and #2) or nonspecific siRNA control. (A) Western blot showing expression of total-WEE1,  $\gamma$ H2AX, cleaved PARP, and actin (loading control) in RPP cells and RPM cells. (B) Quantitative mRNA expression of *IFN- $\alpha$* , *IFN- $\beta$*  in RPP and RPM cells following knockdown. The bars represent mean  $\pm$  SD of triplicate. Statistical significance was determined using Student's t-test (\*p < 0.05, \*\*p < 0.01, \*\*\*p < 0.001).

Figure S4:

**A**

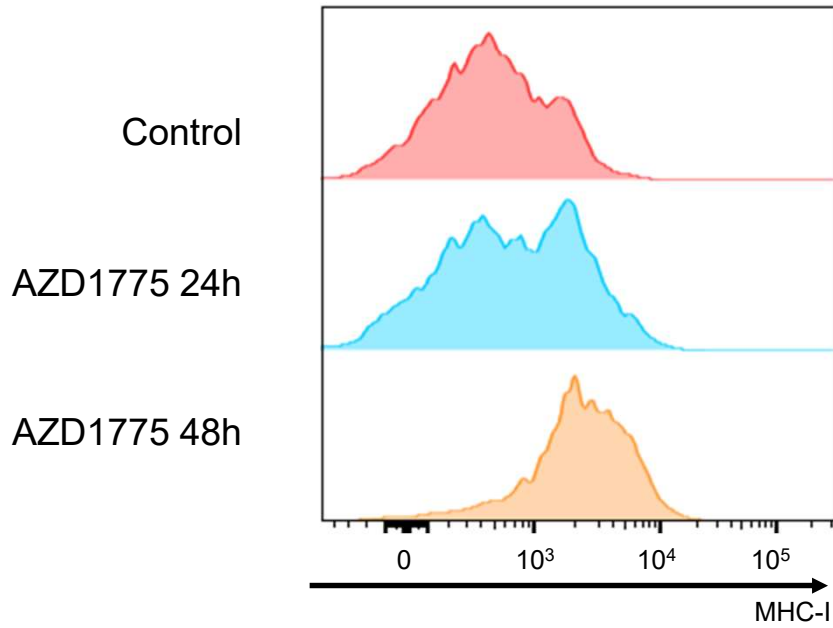

**B**      ■ Control      ■ AZD1775 (1  $\mu$ mol/L) for 48 hours

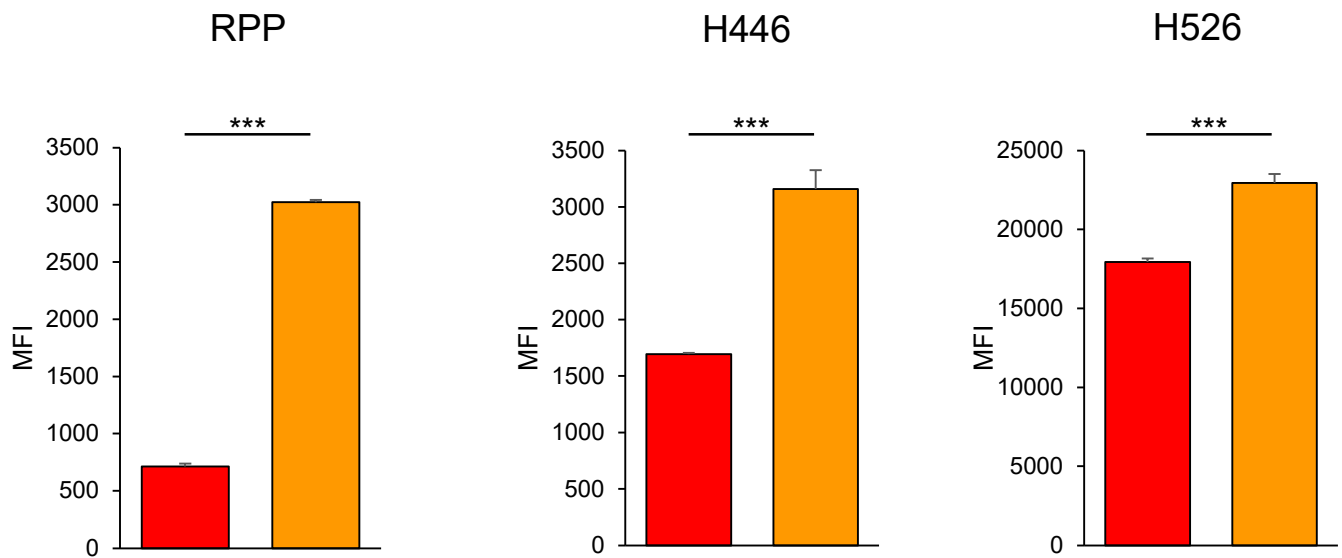



**Figure S4. WEE1 inhibitor induces the cell surface MHC-I expression, Related to Figure 2.**

(A) Representative histogram of MHC-I expression in RPP cells tested by flow cytometry following 24- or 48-hour treatment with 1 $\mu$ M AZD1775. (B) MFI of MHC-I in SCLC (RPP, H446, H526) treated with 1 $\mu$ M AZD6738 for 48 hours. The bars represent mean  $\pm$  SD of triplicate. Statistical significance was determined using Student's t-test (\*\*p < 0.01).

Figure S5:

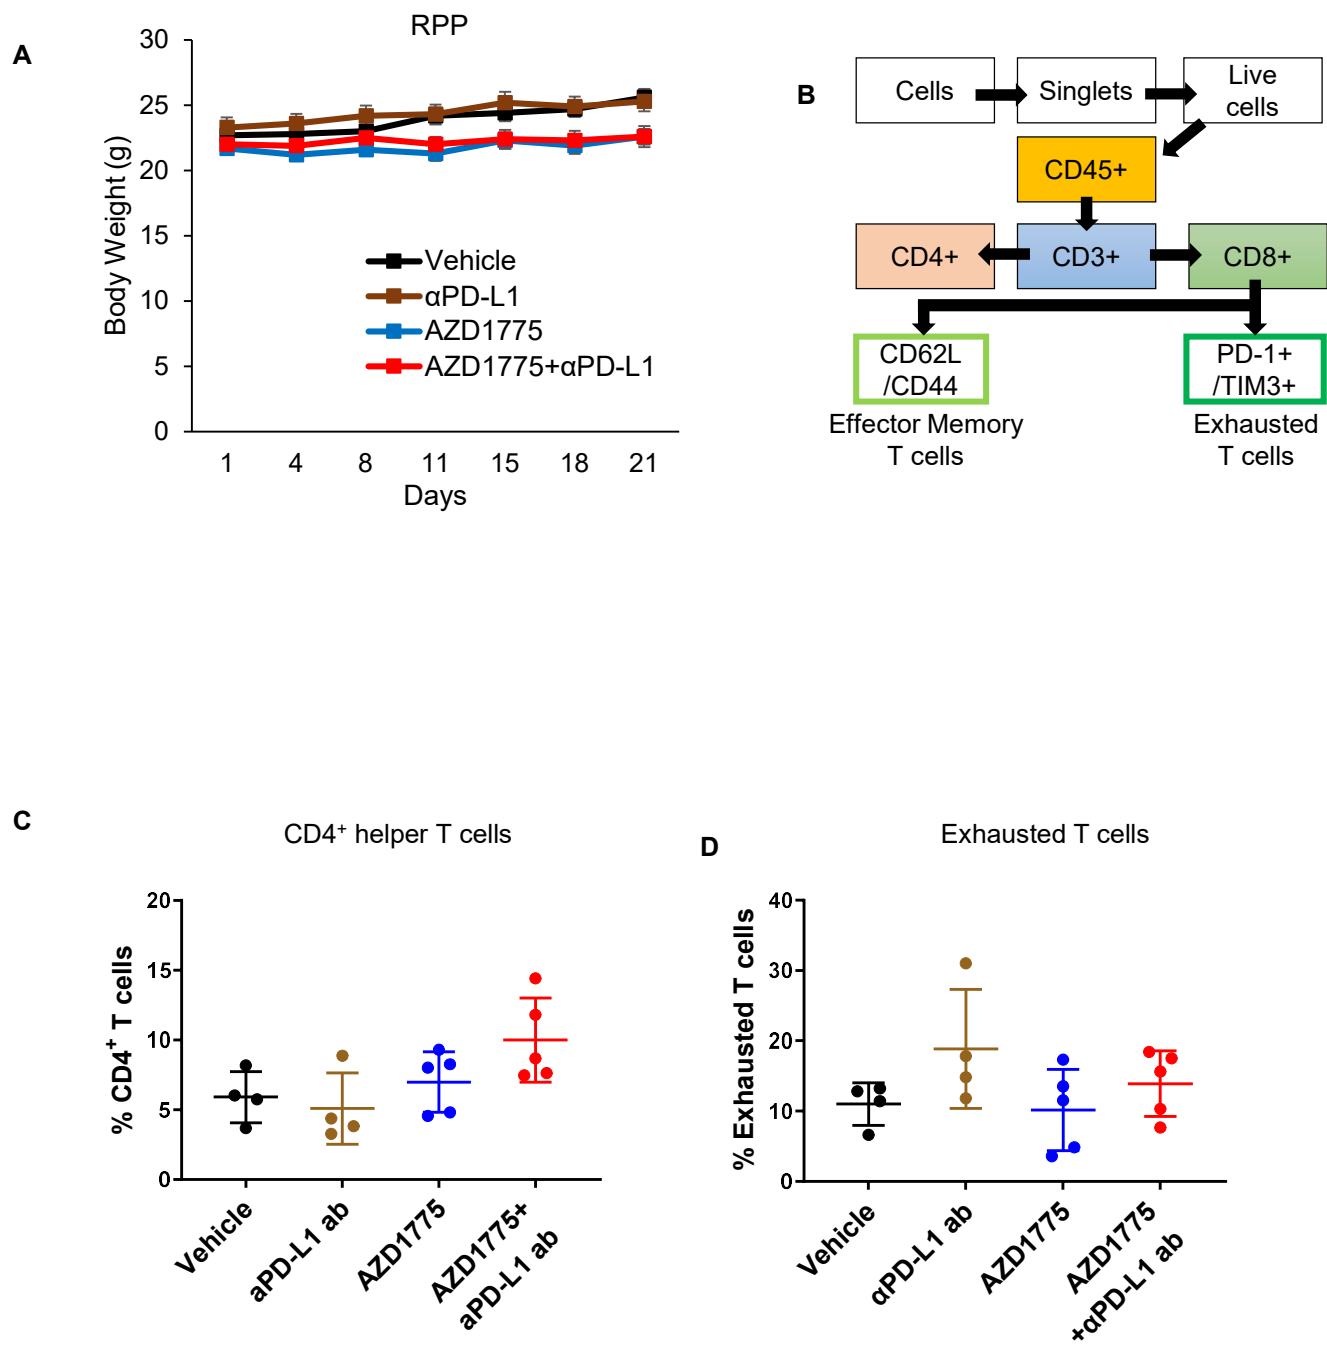

**Figure S5. WEE1 inhibition enhances antitumor responses induced by anti-PD-L1 antibody in the *in vivo* RPP model, Related to Figure 3.**

(A) Body weight curves the means  $\pm$  SEM of vehicle, AZD1775 alone (60 mg/kg, 5 of 7 days, Q.D.), anti-PD-L1 antibody alone (300  $\mu$ g/body, 1 of 7 days), and AZD1775 plus anti-PD-L1 antibody groups in B6 129F1 mice injected with RPP cells ( $n = 10$  per groups). (B) Gating strategy of tumors flow cytometry analysis. (C-D) Tumors in Fig. 3A were harvested on day 15 for immune profiling by flow cytometry. Cumulative data for the tumors are shown. Flow cytometry analysis of (C) CD45<sup>+</sup>CD3<sup>+</sup>CD4<sup>+</sup> T cells and (D) CD45<sup>+</sup>CD3<sup>+</sup>CD8<sup>+</sup>PD-1<sup>+</sup>TIM3<sup>+</sup> T cells. Percentages in C were the ratio to CD45<sup>+</sup> cells. Percentages in D were the ratio to CD8<sup>+</sup> cells. ( $n = 5$  for Vehicle and anti-PD-L1 group,  $n = 6$  for AZD1775 and AZD1775+anti-PD-L1 group). The bars represent mean  $\pm$  SD of triplicate. Statistical significance was determined using Student's t-test (without bars; not significant).

Figure S6:

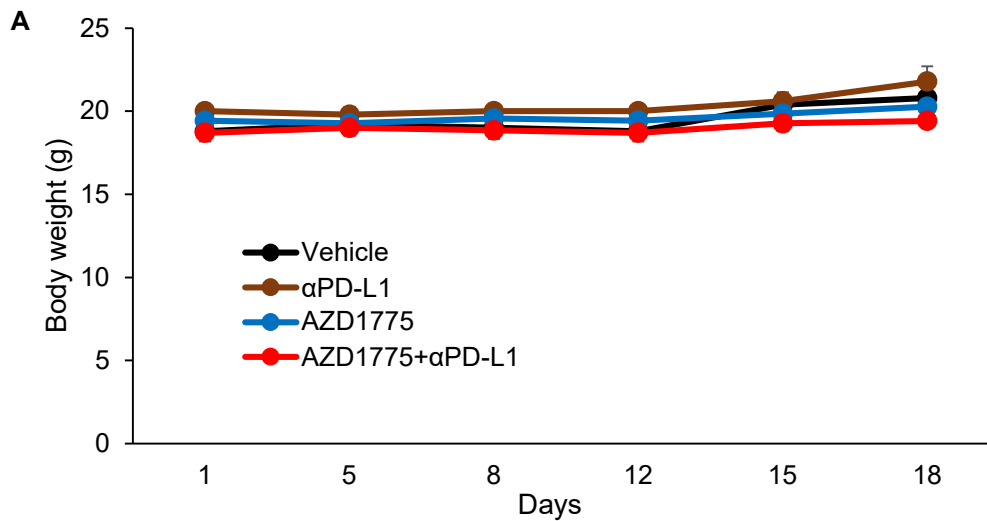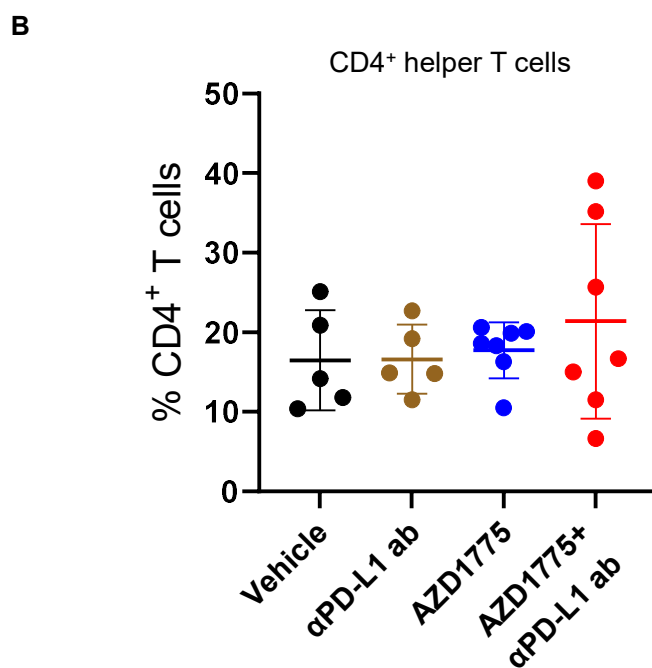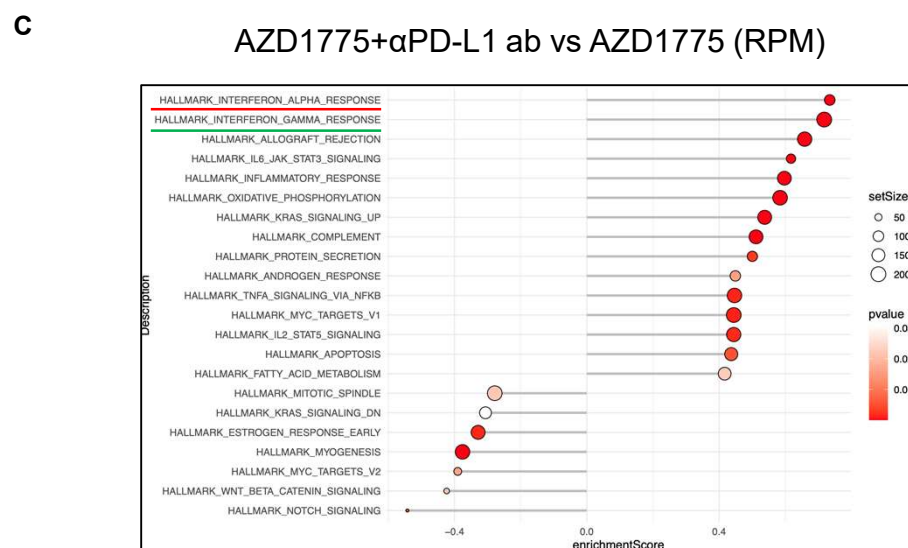

**Figure S6. WEE1 inhibition enhances antitumor responses induced by anti-PD-L1 antibody in the *in vivo* RPM model, Related to Figure 4.**

(A) Body weight curves the means  $\pm$  SE from vehicle, AZD1775 alone (60 mg/kg, 5 of 7 days, Q.D.), anti-PD-L1 antibody alone (300  $\mu$ g, 1 of 7 days), and AZD1775 plus anti-PD-L1 antibody groups in B6FVBF1/J mice injected with RPM cells ( $n = 5$  for vehicle and anti-PD-L1 groups,  $n = 7$  for AZD1775 and AZD1775 plus anti-PD-L1 groups). (B) Tumors in Fig. 4A were harvested on day 19 for immune profiling by flow cytometry of CD45<sup>+</sup>CD3<sup>+</sup>CD4<sup>+</sup> T cells. Cumulative data for the tumors are shown. Percentages were ratio to CD45<sup>+</sup> cells ( $n = 5$  for Vehicle and anti-PD-L1 group,  $n = 7$  for AZD1775 and AZD1775+anti-PD-L1 group). The bars represent mean  $\pm$  SD of triplicate. Statistical significance was determined using Student's t-test (without bars; not significant). (C) HALLMARK pathway enrichment analyses of differentially expressed genes (DEGs) from RPM-tumors on the mice treated with AZD1775 or AZD1775 plus anti-PD-L1 antibody for 21 days. The data shown AZD1775 plus anti-PD-L1 antibody versus AZD1775 ( $n = 5$  per group).

Figure S7:

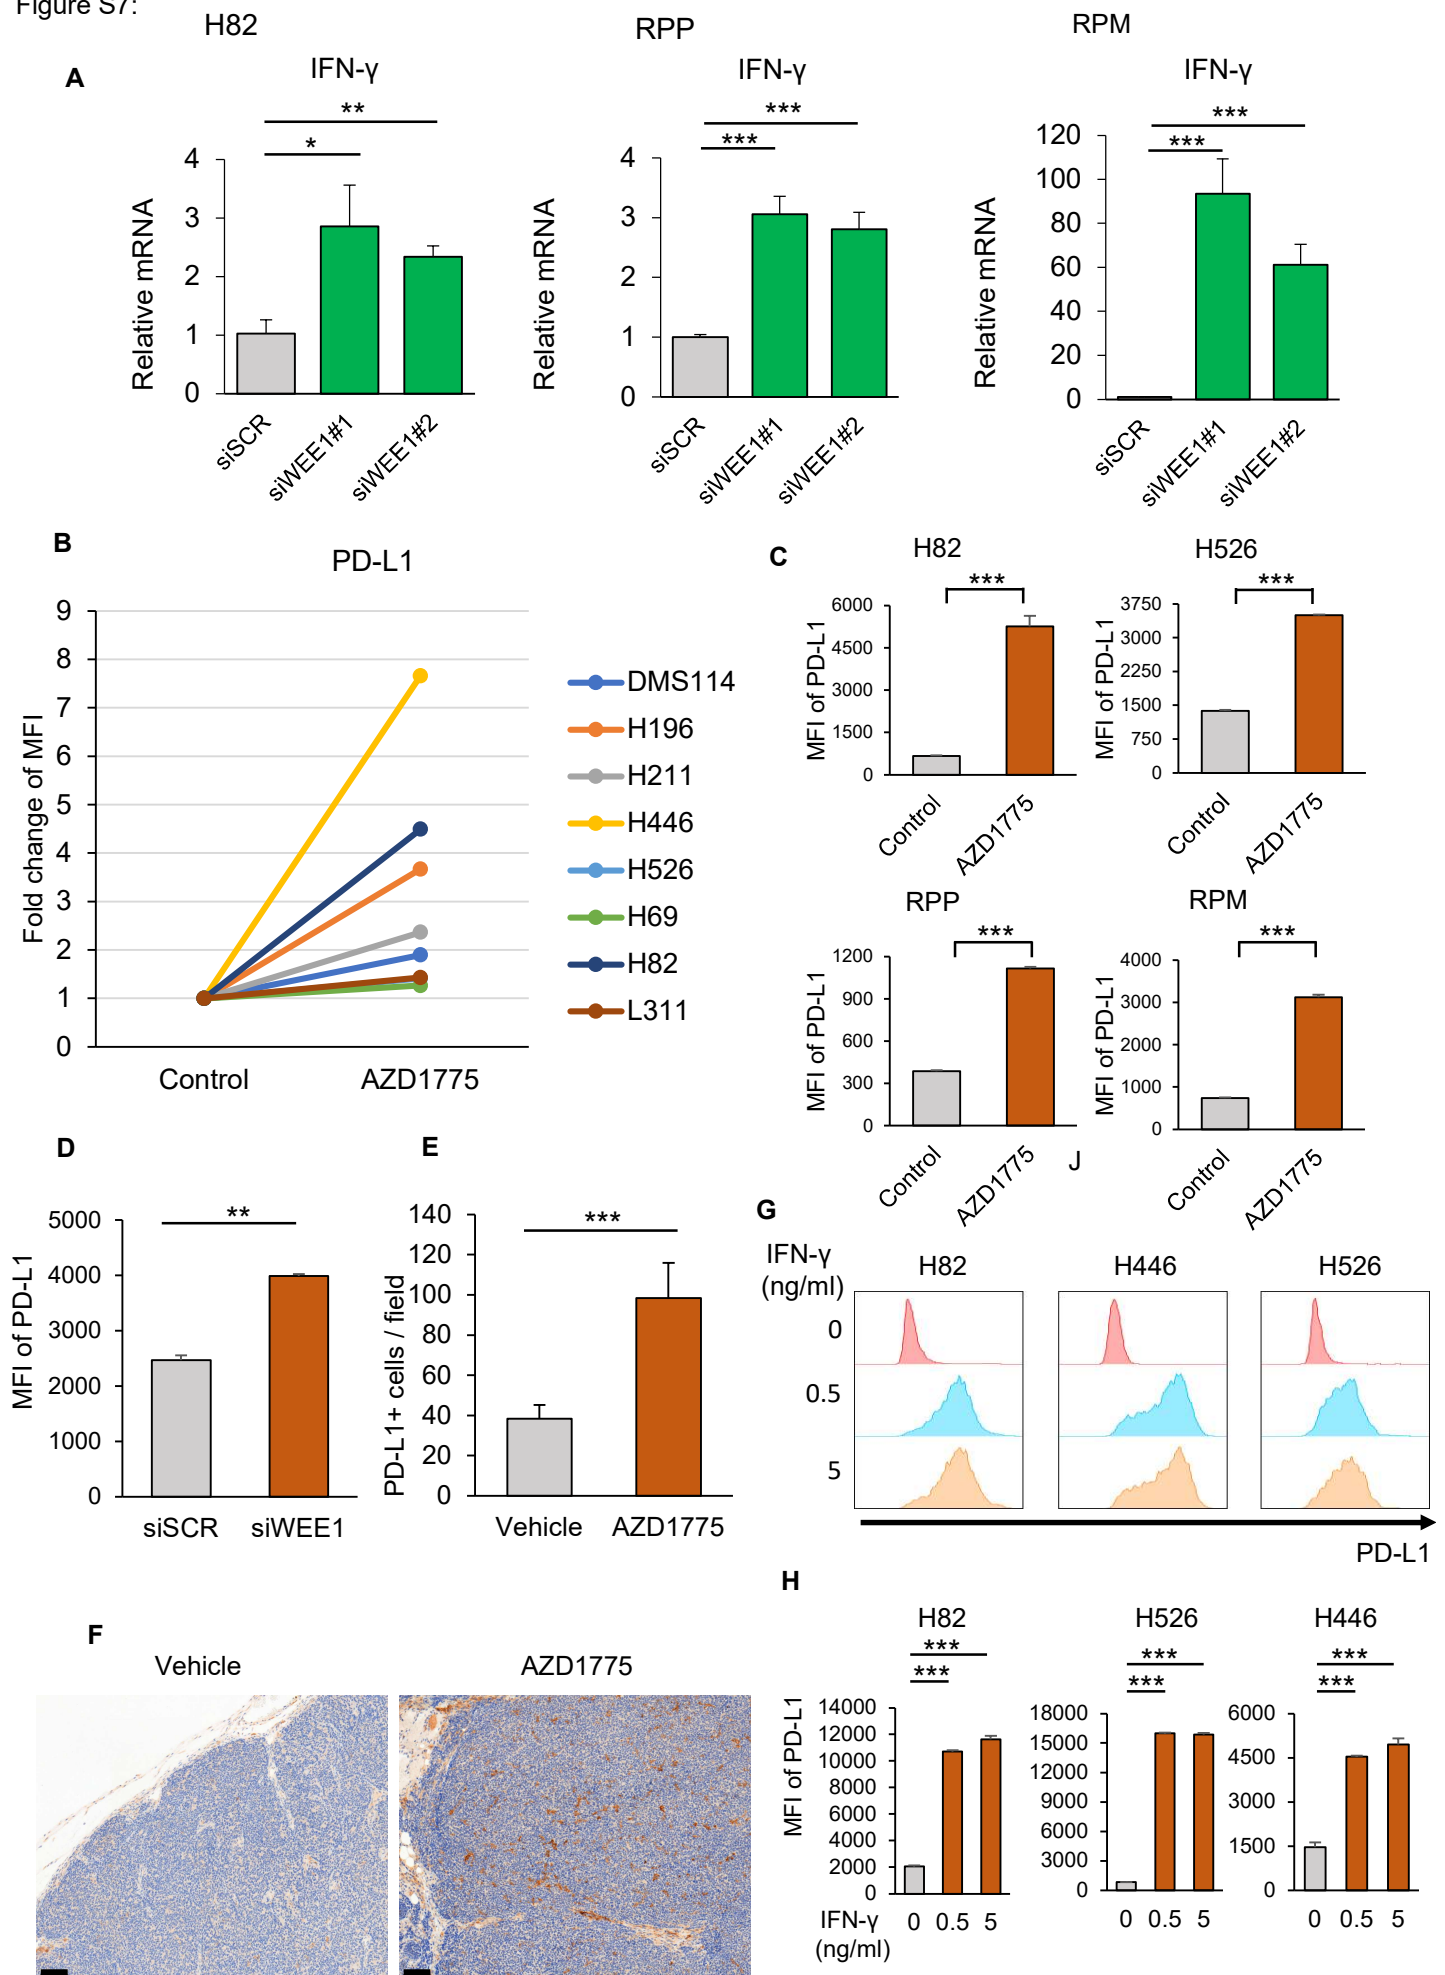

**Figure S7. WEE1 inhibition increased IFN- $\gamma$  mRNA and cell surface PD-L1 expression in SCLC, Related to Figure 5.**

(A) Quantitative mRNA expression of *IFN- $\gamma$*  in H82, RPP and RPM cells following knockdown of WEE1 with WEE1-specific siRNAs (#1 and #2) or nonspecific siRNA control. The bars represent mean  $\pm$  SD of triplicate. Statistical significance was determined using Student's t-test (\* $p < 0.05$ , \*\* $p < 0.01$ ). (B) The quantification of mean fluorescence intensity (MFI) of PD-L1 in SCLC cell (DMS114, H196, H211, H446, H526, H69, H82 and L311) by flow cytometry following 72 hour treatment with 1 $\mu$ M AZD1775. The bars represent mean of triplicate. (C) Representative MFI changes of PD-L1 expression in SCLC (H82, H526, RPP, and RPM) by flow cytometry following 72 hour treatment with 1  $\mu$ M AZD1775. The bars represent mean  $\pm$  SD of triplicate. Statistical significance was determined using Student's t-test (\* $p < 0.05$ , \*\* $p < 0.01$ ). (D) MFI of PD-L1 expression in H82 cells following knockdown of WEE1 with specific siRNA or nonspecific siRNA control. The bars represent mean  $\pm$  SD of triplicate. Statistical significance was determined using Student's t-test (\*\* $p < 0.01$ ). (E) The number of PD-L1 expressed cells in immunohistochemistry staining that was performed in resected tumors of RPP model on day 21 (from Fig 3A). The average number of PD-L1 positive cells from five areas of five tumors in each group, and (F) the representative images of immunohistochemistry staining are shown. The data shown represent the means of five areas  $\pm$  SD. Scale bar; 100 $\mu$ m. Statistical significance was determined using Student's t-test (\*\* $p < 0.01$ ). (G) Representative histogram of PD-L1 expression in SCLC cells tested by flow cytometry following 48 hours treatment with 0.5 or 5 ng/ml of IFN- $\gamma$  and (H) MFI of PD-L1 in SCLC (H82, H526, H446) treated with 0.5 or 5 ng/ml of IFN- $\gamma$ . The bars represent mean  $\pm$  SD of triplicate. Statistical significance was determined using Student's t-test (\*\* $p < 0.01$ ).

Figure S8:

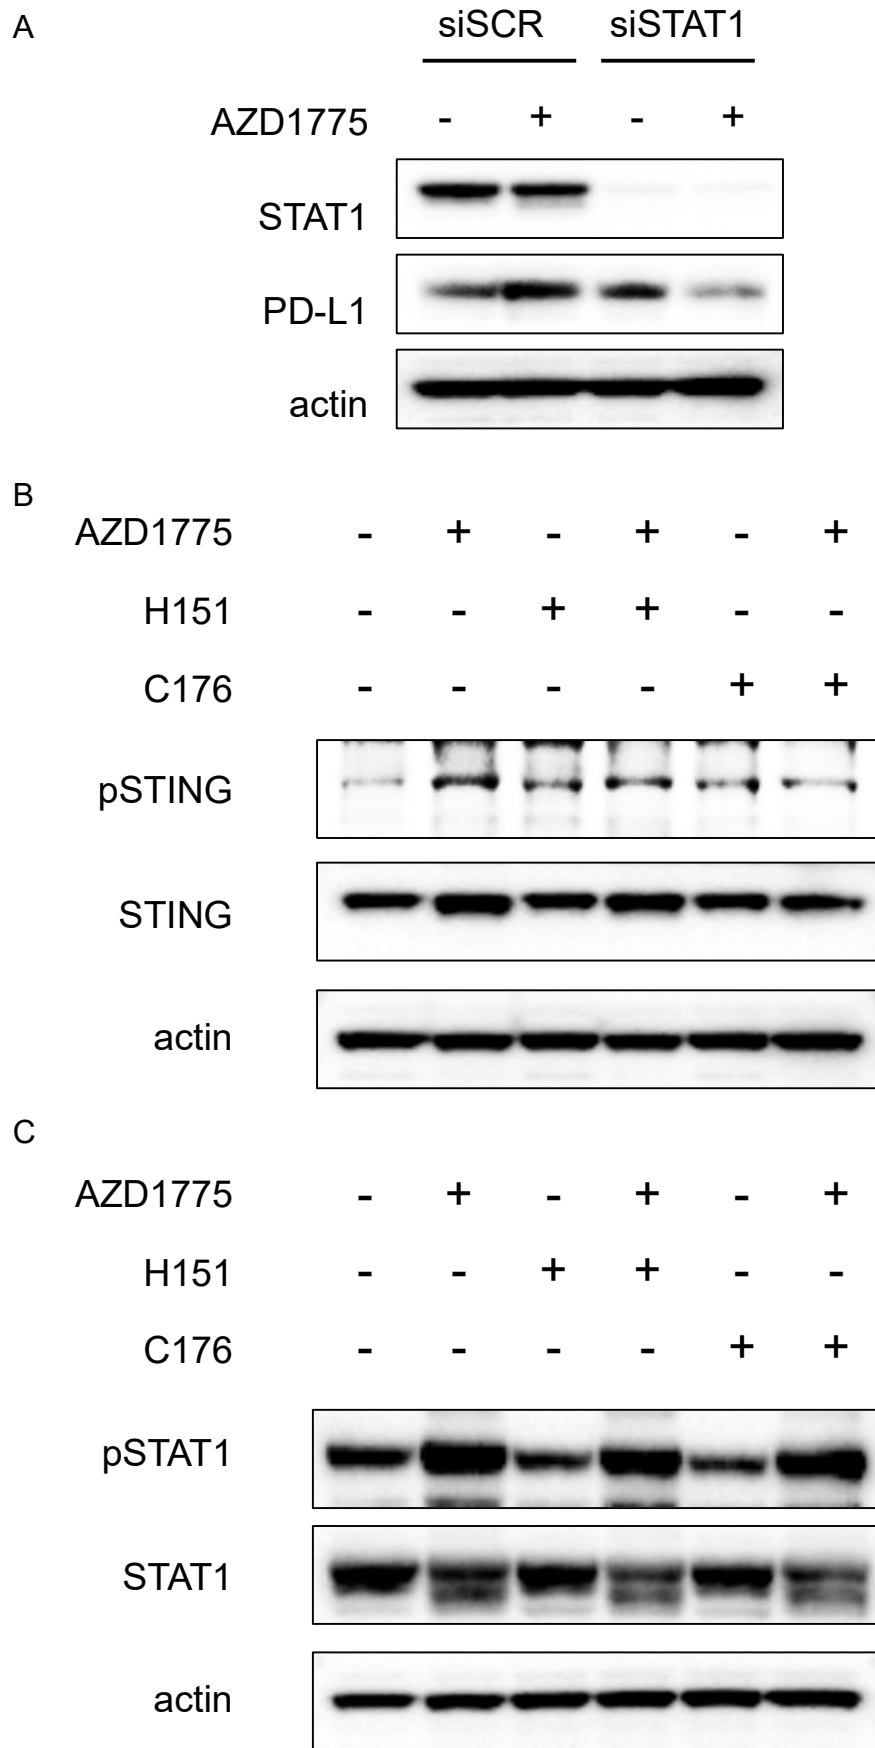



**Figure S8. Inhibition of STAT1 or STING with AZD1775 treatment in SCLC, Related to Figure 6.**

(A) Knockdown of STAT1 (or nonspecific siRNA control [siSCR]) by siRNA followed by treatment with 0.5  $\mu$ M AZD1775 for 72 hours in H82 cells. Western blot shows STAT1, PD-L1 and actin in H82 cells.

(B)(C) Western blot shows (B) phospho (p)- and total (t)-STING in H526 treated with 1  $\mu$ M AZD1775 and/or 0.5 $\mu$ M H151, 1 $\mu$ M C176 for 48 hours and (C) phospho (p)- and total (t)-STAT1 and actin in H526 treated with 1  $\mu$ M AZD1775 and/or 0.5  $\mu$ M H151, 1 $\mu$ M C176 for 24hours.

**Table S1. Probes used for real time PCR, Related to STAR Methods.**

| Human         |               |               |
|---------------|---------------|---------------|
| Gene          | Company       | Assay ID      |
| IFN- $\alpha$ | Thermo Fisher | Hs03044218_g1 |
| IFN- $\beta$  | Thermo Fisher | Hs01077958_s1 |
| IFN- $\gamma$ | Thermo Fisher | Hs00989291_m1 |
| CXCL10        | Thermo Fisher | Hs00171042_m1 |
| CCL5          | Thermo Fisher | Hs99999048_m1 |
| IRF1          | Thermo Fisher | Hs00971960_m1 |
| GAPDH         | Thermo Fisher | Hs99999905_m1 |
| Mouse         |               |               |
| Gene          | Company       | Assay ID      |
| IFN- $\alpha$ | Thermo Fisher | Mm00833969_s1 |
| IFN- $\beta$  | Thermo Fisher | Mm00439552_s1 |
| IFN- $\gamma$ | Thermo Fisher | Mm01168134_m1 |
| CXCL10        | Thermo Fisher | Mm00445235_m1 |
| CCL5          | Thermo Fisher | Mm01302427_m1 |
| GAPDH         | Thermo Fisher | Mm99999915_g1 |

**Table S2. Antibodies used for flow cytometry, Related to STAR Methods.**

| Color            | Maker                   | Company    | Catalog#     | Dilution |
|------------------|-------------------------|------------|--------------|----------|
| APC Cy7          | CD4                     | BioLegend  | 100526       | 1/400    |
| PE Cy7           | CD8                     | BioLegend  | 100722       | 1/800    |
| Pacific Blue     | CD45                    | BioLegend  | 103126       | 1/100    |
| PE-594           | CD3                     | BioLegend  | 100246       | 1/100    |
| Ghost violet 510 | Live/Dead               | Tonbo      | 13-0870-T500 | 1/100    |
| BV605            | PD1                     | BioLegend  | 135220       | 1/50     |
| AF700            | CD62L                   | BD         | 560517       | 1/50     |
| BV711            | CD44                    | BioLegend  | 103057       | 1/100    |
| APC              | TIM3                    | BioLegend  | 134008       | 1/200    |
| BV711            | GR-1                    | BioLegend  | 108443       | 1/200    |
| APC              | F4/80                   | Tonbo      | 20-4801-U100 | 1/100    |
| BV650            | CD11b                   | BioLegend  | 101259       | 1/100    |
| PerCP Cy5.5      | CD68                    | BioLegend  | 137010       | 1/100    |
| PE               | iNOS                    | Invitrogen | 12-5920-80   | 1/50     |
| PE               | PD-L1 (murine)          | BD         | 558091       | 1/100    |
| APC              | PD-L1 (human)           | BioLegend  | 329708       | 1/100    |
| FITC             | H-2Kb/H-2Dd<br>(murine) | BioLegend  | 114706       | 1/100    |
| PE               | HLA-ABC                 | BioLegend  | 311406       | 1/100    |

**Table S3. Antibodies used for immunohistochemistry, Related to STAR Methods.**

| <b>MARKER</b> | <b>EPITOPE RETRIEVAL</b> | <b>PRIMARY ANTIBODY VENDOR, CAT. NO.</b> | <b>PRIMARY ANTIBODY DILUTION</b> | <b>SECONDARY ANTIBODY SOURCE, CAT. NO.</b> | <b>SECONDARY ANTIBODY CONCENTRATION</b>  |
|---------------|--------------------------|------------------------------------------|----------------------------------|--------------------------------------------|------------------------------------------|
| <b>CD3</b>    | Heat Induced, pH6        | Abcam, ab135372                          | 1:250                            | Leica Biosystems, DS9800 kit, reagent #3   | Used at concentration provided by vendor |
| <b>CD8a</b>   | Heat induced, pH9        | Cedarlane, HS-361 003(Sy)                | 1:250                            | Leica Biosystems, DS9800 kit, reagent #3   | Used at concentration provided by vendor |
| <b>PD-L1</b>  | Heat induced, pH9        | R&D System, AF1019                       | 1:100                            | Vector Labs, BA5000                        | 1:1000                                   |
